# Supplementary material for: Robust behavioural effects in response to acute, but not repeated, terpene administration in Zebrafish (Danio rerio)
Source: Sci Rep. 2021 Sep 28;11:19214. doi: 10.1038/s41598-021-98768-1 (PMC8478887; doi:10.1038/s41598-021-98768-1)
Supplement: Supplementary file 1 — Supplementary Information 1. [file 41598_2021_98768_MOESM1_ESM.xlsx]

## Sheet: Open Field Test
	Limonene (%)	Myrcene (%)	Linalool (%)
Center Zone	0.189496	0.0105728	0.000740091
Thigmotaxis Zone	0.232136	0.0110374	0.000881539

## Sheet: Novel Object Approach Test
	Limonene (%)	Myrcene (%)	Linalool (%)
Center Zone	0.521488	0.00958787	0.0017893
Thigmotaxis Zone	0.385	0.008316	0.000514
