# Supplementary material for: Robust behavioural effects in response to acute, but not repeated, terpene administration in Zebrafish (Danio rerio)
Source: Sci Rep. 2021 Sep 28;11:19214. doi: 10.1038/s41598-021-98768-1 (PMC8478887; doi:10.1038/s41598-021-98768-1)
Supplement: Supplementary file 2 — Supplementary Information 2. [file 41598_2021_98768_MOESM2_ESM.xlsx]

## Sheet: OF - Distance moved
Control	Limonene			Linalool			Myrcene
0	0.25	0.5	0.75	0.0001	0.001	0.00125	0.001	0.01	0.1
6708.1	6117.2	1595.76	5990.25	5458.51	5014.53	7345.84	6035.13	5884.65	6731.83
2750.24	3035.08	3436.5	6493.2	5348.51	7390.76	4275.31	6365.25	8426.19	3503.61
8748.21	2367.28	10329.7	4504.16	3725.99	4323.44	7971.72	6792.54	5817.81	4319.3
6324.67	2128.25	5626.83	4685.2	5062.28	5478.5	10235.4	5467.55	3865.17	5129.92
5959.71	3299.46	6546.3	4336.17	6726.02	6670.06	8847.77	7600.8	6341.22	6738.37
5837.98	4144.23	3938.75	1521.87	5048.18	6667.37	6534.55	4507.35	5740.49	5107.92
8627.22	4023.79	2878.13	3129.11	5174.6	6710.04	7422.04	4353.8	4596.06	5815.89
4572.93	5456.58	3020.8	1539.83	7851.26	4617.42	5605.54	5589.6	3757.16	4817.5
4354.91	3749.07	4978.75	1627.87	5201.83	6561.19	7241.74	8062.17	9393.71	5648.86
12334.9	5445.18	4725.18	1159.05	3138.18	4851.35	6344.6	5515.12	4628.75	5883.47
6892.71	3845.26	6415.59	2050	5452.26	4371.14	8008.01	7668.31	6337.41	4417.84
6034.12	2576.68	5485.27	1676.6	5387.97	5528.32	6370.92	5689.7	3581.47	5090.71
6326.78	4036.24	2905.45	2689.02	5563.21	5211.64	6898.29	4364.54	9240.84	9383.42
5967.98	6493.96	5670.54	2105.62	6585.35	5862.31	5656.11	6254.11	5991.92	5307.84
6430.42	4476.88	1573.79	5828.6		4393.28	7554.71	7536.28	4208.2	2131.76
6652.82		3308.18
8240.68
4588.03
6077.97
6727.54
7931.08
6150.49
6069.74
10241.3
7209.52
5812.4
6754.58

## Sheet: OF - Velocity
Control	Limonene			Linalool			Myrcene
0	0.25	0.5	0.75	0.0001	0.001	0.00125	0.001	0.01	0.1
11.1831	10.1981	2.66067	9.98375	9.18199	8.36425	12.2431	10.0599	9.80774	11.2197
4.58495	5.05847	5.7298	10.822	8.92073	12.3212	7.126	10.6116	14.0437	5.83936
14.5862	3.94758	17.2161	7.50694	6.20999	7.20573	13.2862	11.3209	9.69634	7.19884
10.5425	3.54709	9.3793	7.80867	8.44389	9.13448	17.059	9.11623	6.44194	8.54987
9.93285	5.50057	10.912	7.22696	11.21	11.1227	14.7463	12.668	10.5687	11.2306
9.73386	6.90797	6.56633	2.53645	8.45195	11.1182	10.8909	7.51426	9.56748	8.5132
14.3806	6.70632	4.84665	5.21518	8.65376	11.1834	12.3701	7.25634	7.6601	9.69315
7.62459	9.09551	5.03533	2.56638	13.0854	7.69569	9.34257	9.32097	6.26194	8.02916
7.26303	6.24845	8.29903	2.71311	8.67204	10.9353	12.0696	13.437	15.6562	9.41476
20.5718	9.07651	7.8753	1.93175	5.2303	8.08558	10.5743	9.19309	7.71458	9.80579
11.494	6.61289	10.6955	3.41667	9.08711	7.2867	13.3467	12.7805	10.5623	7.36307
10.0569	4.41213	9.14333	2.79433	8.97996	9.21387	10.6182	9.48789	5.96911	8.48452
10.5531	6.72796	4.84241	4.4817	9.27202	8.68607	11.4971	7.28443	15.4014	15.639
9.94928	10.8247	9.45342	3.50937	10.9756	9.77051	9.42685	10.4235	9.98653	8.8464
10.7174	7.46147	2.62351	9.71434		7.32213	12.5912	12.563	7.01367	3.55293
11.088		5.51583
13.7345
7.64672
10.13
11.2126
13.2185
10.2508
10.1162
17.0688
12.0159
9.68733
11.2576

## Sheet: OF - Center Zone
Control	Limonene			Linalool			Myrcene
0	0.25	0.5	0.75	0.0001	0.001	0.00125	0.001	0.01	0.1
0.96	4.44	103.08	0	2	15.36	5.84	4.64	11.92	42.48
1.88	84.56	65.32	2.36	7.44	8.44	23.08	3.84	3.4	10.8
4.08	58.48	1.36	13.2	3.64	14.48	20.76	2.2	4.52	24.68
3.64	254.12	3.72	0	14.36	6.56	6.52	9.08	17.72	6.84
3.48	35.48	4.76	14.48	2.16	9.32	8.44	14.8	16.2	7.24
0.28	42.16	46.68	0.96	3.12	13.52	13.04	26.08	8.88	16.24
0	27.88	55.96	86.28	3.72	25	3.36	4.2	6.2	13.4
1.48	2.2	32.04	78.68	2.52	10.8	22.48	13.04	52.96	8
20.4	14.8	33.08	38.72	9.6	3.08	11.4	6.52	10.44	7.56
0.36	10.08	38.4	31.56	44.4	15.12	0.32	25.8	7.92	2.64
6.16	9.8	8.36	222.64	7.64	6.04	7.12	4.44	19.56	12.56
19.68	33.92	26.6	161.12	5.16	7.76	9	7	10.12	9.68
11.76	0.76	168.84	66.76	14.48	64.08	7.72	15.08	5.32	16.52
12.8	2	34.56	31.36	11.44	16.48	20.88	8.68	9.96	39.8
8.28	9.92	181.16	23.56		8.36	0.64	10.8	5.08	28.72
14.96		145.04
15.04
7.28
6.24
4.76
5.4
2.32
21.4
6.92
14.68
7.48
1.24

## Sheet: OF - Transition Zone
Control	Limonene			Linalool			Myrcene
0	0.25	0.5	0.75	0.0001	0.001	0.00125	0.001	0.01	0.1
20.08	21.84	364.4	14.28	47.8	39.2	121.2	29.12	83.08	150.28
10.12	338.76	108.24	67.24	2.92	30.96	12.8	19.72	29.64	95.8
24.36	255.12	6.68	212.08	58.44	54.16	10.88	32.32	18.36	133.76
42.32	259.2	18.76	66.2	133.96	82.68	4.92	42.68	126.96	53.72
18.84	139.96	47.48	50.72	76.52	23.12	18.36	176.28	68.76	43.24
6.24	210.8	155.4	75.12	0	55.28	172.92	165.8	48.32	88.72
9	117.24	201.88	235.16	41.04	17.08	3.4	134.6	280.6	73.76
7.2	54.36	180.64	426.12	59.48	196.04	131.92	60.16	193.36	41.84
117.8	79.04	128.6	315.56	4.12	41.32	25.96	95.92	43.16	61.68
6.92	63.72	224.16	241.04	0	163.64	106.92	133.4	69.64	13.64
36.44	59.52	39.08	204.84	20.32	51.64	5.4	55.28	102.56	104.88
95	191	129.64	351.28	83.16	5.88	53.32	36.96	61.6	122.04
144.44	29.08	325.52	298.8	33.68	145.12	42.36	99.24	33.48	62.72
70.64	19.32	124.16	315.36	34.64	11.92	196.08	54.12	55.96	83.84
67.08	108.28	322.6	117.96	83.08	203.28	36.2	64.28	37.96	286.12
71.88		292
58.64
29.8
26.92
33.4
23.4
31.2
81.68
23.28
81.76
20.72
12.8

## Sheet: OF - Thigmotaxis Zone
Control	Limonene			Linalool			Myrcene
0	0.25	0.5	0.75	0.0001	0.001	0.00125	0.001	0.01	0.1
579	573.76	132.56	585.76	568.76	464.12	567	566.28	505.04	407.28
588.04	176.72	426.48	530.44	553.16	560.12	450.08	576.48	567	493.44
571.6	286.44	592	374.76	547.12	520.08	505.08	565.52	577.16	441.6
554.08	86.72	577.56	533.84	555.4	534.92	559.8	548.28	455.36	539.48
577.72	424.6	547.8	534.84	586.64	542.64	549.36	408.96	515.08	549.56
593.52	347.08	397.96	523.96	577.84	492.48	524.32	408.16	542.84	495.08
591.04	454.92	342.2	278.6	576.76	481.76	584.48	461.24	313.24	512.88
591.36	543.48	387.36	95.24	583.76	527.88	506.84	526.84	353.72	550.2
461.84	506.2	438.36	245.76	554.04	582.16	491.84	497.6	546.44	530.8
592.76	526.24	337.48	327.44	361.48	521.96	587.8	440.84	522.48	583.76
557.44	530.64	552.6	172.56	548.2	574.52	565.76	540.32	477.92	482.6
485.36	374.88	443.8	87.64	576.04	551.6	563.76	556.08	528.32	468.32
443.84	570.2	105.68	234.48	502.96	352.76	550.4	485.24	561.24	520.8
516.6	578.72	441.32	253.32	526.52	537.36	513.56	537.24	534.12	476.4
524.68	481.84	96.28	458.52		530.96	587.16	524.96	557	285.2
513.2		163
526.36
562.96
566.88
561.88
571.24
566.52
496.96
569.84
503.6
571.84
586

## Sheet: OF - Meandering 
Control	Limonene			Linalool			Myrcene
0	0.25	0.5	0.75	0.0001	0.001	0.00125	0.001	0.01	0.1
1163.09	23.9011	3861.66	14.0228	251.858	19.5271	27.2542	51.4628	15.1344	13.0908
7193.52	87.4984	95.3992	12.7591	29.825	712.296	179.871	49.9175	34.2377	29.858
18.4464	252.797	31.1175	14.4223	146.566	33.7627	10.6871	27.7605	31.6921	16.0067
382.812	215.579	32.0963	144.97	24.502	13.1307	19.7426	2155.74	53.2144	22.3322
33.2465	38.6453	51.1682	16.3167	31.2476	34.4992	819.567	16.3279	64.1542	31.2459
4287.7	477.874	188.813	3317.58	52.48	11.6722	8.45845	15.9056	30.7317	21.4679
329.705	367.161	919.919	47.1665	81.1222	18.5558	39.0733	3718.39	18.4144	11.3034
367.265	38.1919	74.8469	1543.59	46.6606	28.0498	30.075	36.8775	34.5994	50.9365
1827.48	816.129	193.443	7693.4	37.4481	39.5378	12.4598	33.3666	24.2852	19.8651
58.8518	28.4727	1796.32	5016.01	68.6014	35.1897	32.1888	16.4171	49.3481	2343.77
1856.78	97.7518	11.0539	746.664	108.791	24.7942	18.7441	53.8273	21.6625	20.9968
12.4179	661.337	19.783	187.703	44.6076	25.7381	63.1052	34.5751	62.7868	15.4938
134.289	1823.56	546.308	45.1582	33.972	17.2867	646.263	24.7252	25.9241	107.591
14.357	18.7558	522.077	153.702	8.14548	21.7111	41.9211	105.065	50.8394	100.948
34.8957	1860.97	901.546	20.4038		34.0049	42.269	8.38238	35.3915	74.4243
35.9901		126.126
15.5461
19.6441
47.9286
46.0542
21.0403
73.3547
19.3257
19.0674
13.3675
11.4723
37.0601

## Sheet: OF - Immobility
Control	Limonene			Linalool			Myrcene
0	0.25	0.5	0.75	0.0001	0.001	0.00125	0.001	0.01	0.1
31.56	0.2	168.56	5.12	8.72	8.32	0.04	0.64	0.68	4.88
179.32	23.32	24.84	1.6	1.84	20.68	42.72	0.56	1.76	6.96
0.24	23.52	0.04	9.48	19.76	25.84	0.36	1.24	0.48	8.8
16.48	38.4	0.56	21.56	2.52	1.24	0	48.92	9.04	5.36
1.2	15.12	0.48	3.04	0.44	1.16	17.76	4.92	1.52	1.36
80.12	31.28	21.12	124.2	1.6	1.32	3.52	11.04	0.28	3.68
14.52	54.72	46.88	26.44	9.56	1.48	0.28	132.68	13.04	2.96
12.16	8.6	17.6	102.36	0.76	4.96	1.36	1.56	21.44	7.68
52.36	34.56	37.96	285.04	5.24	0.32	2.28	0.28	0.36	3.36
0	6.88	107.48	222.08	11.44	5.88	0.28	4.56	8	53.16
44.4	9.64	0.48	105.16	26.4	4.36	0.04	5.04	3.44	6.16
0.6	40.48	1.44	86.88	1.84	0.88	0.4	0.64	5.88	1.16
22.92	51.72	41.36	47.32	3.48	12.44	15.76	14.32	0.84	5.88
0.8	0.4	10.64	68.88	1.36	0.76	1.2	15.4	0.48	6.6
0.8	70.12	125.6	8.4		3.92	0.12	0.08	5.28	68.36
2.08		32.8
1.64
2.36
1.16
2
0.04
0.32
1.4
0.28
0.88
0.16
0.08

## Sheet: OF - High Mobility
Control	Limonene			Linalool			Myrcene
0	0.25	0.5	0.75	0.0001	0.001	0.00125	0.001	0.01	0.1
25.56	16.8	2.64	11.64	141.12	11.4	1.92	24.68	4.36	9.4
25.4	3.92	1.28	6.8	23.6	17	1.8	7.04	41.96	3.72
31.04	3.36	215.36	12.16	3.2	6.32	4.68	17.12	8.6	4.4
25.24	2.72	6.36	11.64	5.32	5.36	77.4	45.08	5.56	2.24
11.24	0.36	5.12	0.24	36.48	6.4	10.04	62.36	8.44	14.68
102.88	8.84	0.92	1.16	68.72	21.96	2.52	4.6	2.92	4.12
52.56	2.28	47.68	0.68	63.24	25.56	8.24	14.92	18.16	7.64
3.2	10.72	0.2	0.68	99.12	4.48	6.08	7.96	6.36	2.84
6.84	4.04	5.88	3.24	10.24	8.32	25.68	31.56	17.72	3.2
237.8	25.08	25.04	0.64	3.44	5.64	5	9.84	6.08	19.36
18.16	89.76	60.48	4.32	12.8	3.8	7.04	19.28	9.32	3.88
4.4	60.32	9.6	0	9.04	6.64	10.88	6.96	4.48	7.04
14.76	8.32	2.28	1.12	18.76	12.24	9.68	3.36	27.16	35.88
4.28	2.8	14.32	1.24	12.72	1.88	8.64	16.32	9.6	7.68
12.84	5.64	0.24	0.76		3	10.16	5.24	2	0.16
18.52		2.44
29.24
1.8
13.56
10.76
46.68
11
12.4
33
10.12
0.76
9.2

## Sheet: NOA - Distance Moved
Control	Limonene			Linalool			Myrcene
0	0.25	0.5	0.75	0.0001	0.001	0.00125	0.001	0.01	0.1
7246.02	4110.87	1535.88	8240.58	4735.79	4142.26	6082.06	5126.19	5112.81	5066.29
3436.38	2522.31	3196.03	6488.3	7117.1	5566.87	2822.01	4869.84	8521.67	3322.56
7187.3	1523.33	8952.9	3449.41	3855.11	4674.71	7427.31	5791.69	5275.05	3480.14
5967.72	2222.89	4408.33	5592.47	3671.38	5163.78	8851.7	2872.48	2975.8	3607.6
4777.12	3375.19	5160.68	3127.63	4386.55	5325.98	6979.85	7526.96	5748.42	5331.7
759.682	4008.14	3513.96	2097.13	5756.79	6945.13	5095.97	5330.37	5576.49	4860.22
4471.17	3998.26	2414.84	568.436	4435.1	6886.81	5337.32	5960.24	4563.48	4596.17
3356.96	5510.31	3323.51	3535.52	4455.79	4628.17	5349.49	5342.14	3818.61	3907.6
4401.41	4215.05	3891.94	3906.1	6316.87	5766.51	5927.7	7227.6	7456.76	4229.77
11835.9	1842.91	4540.1	2961.92	4233.57	3981.92	5612.6	4576.13	4599.97	6469.22
7131.99	2735.73	4682.16	4753.3	3918.6	3591.98	5969.49	8233.05	4620.5	4005.04
7459.54	2177.69	5288	3333.94	4694.74	4878.93	4038.74	5226.74	2742.71	4323.13
4451.06	1046.67	1779.98	2738.57	4604.62	6192.57	5395.39	4650.68	8822.71	8698.02
5683.94	5423.01	4791.74	2618.4	5628.51	5411.47	5382.25	3724.22	5519.28	3822.4
5161.75	6140.3	836.354	3425.93	6557.15	3914.09	6894.78	6141.48	3489.92	3645.34
5452.59		3502.88	4708.79
7700.73
3531.33
4370.16
5645.06
5978.01
5330.35
6758.25
10689.4
6984.66
5285.16
6511.31

## Sheet: NOA - Velocity
Control	Limonene			Linalool			Myrcene
0	0.25	0.5	0.75	0.0001	0.001	0.00125	0.001	0.01	0.1
12.0767	6.85922	2.5598	13.7343	8.09869	6.91252	10.1368	8.54366	8.52135	8.44381
5.7273	4.20497	5.33846	10.8138	11.8618	9.30045	4.70335	8.1164	14.2028	5.5376
11.9788	2.55044	14.9764	5.74901	6.42947	7.79483	12.3789	9.65281	8.79175	5.80023
9.98882	3.70753	7.35262	9.32078	6.11897	8.60629	14.7528	4.78747	4.95967	6.01266
7.96187	5.62532	8.60515	5.21272	7.31189	8.89621	11.6331	12.5474	9.58071	8.88617
1.26647	6.68023	5.87069	3.49522	9.59466	11.5899	8.49328	8.90235	9.29414	8.10037
7.45195	6.66377	4.2446	4.30242	7.47354	11.478	8.89553	9.93374	7.60581	7.66028
5.59493	9.18569	5.53918	5.89254	7.47115	7.71361	8.91581	8.90534	6.36434	6.51267
7.33568	7.02837	6.48657	6.51017	10.5281	9.62432	9.8795	12.05	12.4279	7.04962
19.745	3.07151	7.56683	4.93653	7.05596	6.63653	9.35932	7.62688	7.66662	10.782
11.8866	5.19115	7.84333	7.92216	6.531	5.98663	9.94915	13.7282	7.70083	6.67507
12.4326	4.00016	8.831	5.55657	7.82457	8.14349	6.73124	8.71124	4.57118	7.20522
7.41843	1.74444	2.96743	4.56429	7.67437	10.321	8.99231	7.75113	14.7045	14.4967
9.47323	9.03836	8.00063	4.364	9.38523	9.01912	8.97041	6.20703	9.19881	6.37066
8.60292	10.2359	1.39392	5.70988	10.9286	6.56947	11.4913	10.2379	5.81654	6.07556
9.10648		5.84125	7.85846
12.8346
5.88554
7.28359
9.40843
9.96335
8.88392
11.2638
17.8407
11.6411
8.80859
10.8522

[truncated: 6 more sheets: NOA - Center Zone, NOA - Transition Zone, NOA - Thigmotaxis Zone, NOA - Meandering, NOA - Immobility, NOA - High Mobility]
