# Supplementary material for: Robust behavioural effects in response to acute, but not repeated, terpene administration in Zebrafish (Danio rerio)
Source: Sci Rep. 2021 Sep 28;11:19214. doi: 10.1038/s41598-021-98768-1 (PMC8478887; doi:10.1038/s41598-021-98768-1)
Supplement: Supplementary file 3 — Supplementary Information 3. [file 41598_2021_98768_MOESM3_ESM.xlsx]

## Sheet: OF - Distance Moved
Control (0%)		Limonene (0.39%)		Myrcene (0.0083%)
A	B	A	B	A	B
2574.91	4228.44	6678.99	6829.24	8305.83	5760.83
4671.53	5739.99	4567.5	5236.57	5464.71	5854.8
5178.42	1517.86	5633.12	6518.48	3898.25	4560.47
3641.78	4333.1	6797.69	5640.58	4845.47	4857.2
7281.64	3872.5	2954.85	5106.36	5285.61	5956.24
5059.67	5977.04	5422.98	3453.88	4615.46	5245.49
5283.68	6152	4877.93	5671.2	5325.08	5710.04
5409.16	5954.95	2359.44	4471.67	2914.4	3756.24
3973.25	4447.16	3677.8	5343.74	5453.57	4724.66
5062.11	3636.88	194.674	5321.23	940.333	3780.14

## Sheet: OF - Velocity
Control (0%)		Limonene (0.39%)		Myrcene (0.0083%)
A	B	A	B	A	B
4.29151	7.04741	11.1317	11.3821	13.8431	9.60139
7.78588	9.56666	7.6125	8.72762	9.10786	9.75799
8.6307	2.52977	9.38853	10.8641	6.49708	7.60079
6.06963	7.22183	11.3295	9.40096	8.07578	8.09534
12.1361	6.45417	4.92475	8.51061	8.80934	9.92707
8.43278	9.96174	9.03829	5.75646	7.69243	8.74249
8.80613	10.2533	8.12989	9.45199	8.87513	9.51674
9.01527	9.92492	3.9324	7.45278	4.85733	6.2604
6.62209	7.41193	6.12967	8.90624	9.08929	7.87443
8.43685	6.06147	0.324457	8.86872	1.56722	6.30024

## Sheet: OF - Center Zone
Control (0%)		Limonene (0.39%)		Myrcene (0.0083%)
A	B	A	B	A	B
3.52	16.12	10.64	11.6	0.84	3.6
30.16	7	20.8	20.16	1.56	12.16
0.4	32.72	3.8	2.12	1.36	16.64
2.6	44.2	4.12	2.04	6.08	41.28
6.08	11.2	2.76	38.36	22.16	1.84
20.28	9.32	35.48	7.92	4.72	6.88
1.24	0.56	6.16	4.64	12.64	26.12
10.72	2.36	21.2	0.84	0.12	11.04
5	37.68	1.32	0.52	12.8	44.16
19.88	38.04	16.96	16.76	11.12	45.2

## Sheet: OF - Transition Zone
Control (0%)		Limonene (0.39%)		Myrcene (0.0083%)
A	B	A	B	A	B
30.76	98.8	100.04	155.04	39.52	183.76
157.04	37.04	73.72	102.36	36.52	44.68
55.08	316.64	79.64	27.64	53.8	107.92
51.84	209.44	79.32	64.8	80.68	232.96
66.64	126.04	142.92	267.72	167	46.64
182.4	76.56	213.68	103.48	56.32	95
189.08	54	69.24	123.6	99.72	97.32
335.2	37.32	176.12	38.56	49.2	290.12
96.4	263.64	44.64	37.88	170.52	166.88
108.04	151.68	583.08	197.32	104.96	70.6

## Sheet: OF - Thigmotaxis zone
Control (0%)		Limonene (0.39%)		Myrcene (0.0083%)
A	B	A	B	A	B
565.76	485.12	489.36	433.4	559.68	412.68
412.84	556	505.52	477.52	561.96	543.2
544.56	250.68	516.6	570.28	544.88	475.48
545.6	346.4	516.6	533.2	513.28	325.8
527.32	462.8	454.36	293.96	410.88	551.56
397.36	514.16	350.88	488.64	539	498.16
409.72	545.48	524.64	471.8	487.68	476.6
254.12	560.36	402.72	560.64	550.72	298.88
498.64	298.72	554.08	561.64	416.72	389
472.12	410.32	0	385.96	483.96	484.24

## Sheet: OF - Meandering
Control (0%)		Limonene (0.39%)		Myrcene (0.0083%)
A	B	A	B	A	B
6490.05	35.7198	19.6412	87.8427	29.4682	3025.28
32.0445	59.2863	49.293	28.5998	3468.26	37.1485
32.5583	10665.2	1320.26	46.0262	40.0529	144.836
7492.16	28.6115	34.1904	3539.24	1093.55	35.9289
26.981	5330.96	7455.01	19.2538	179.775	67.0918
27.3996	16.9507	14.9405	2894.3	521.655	18.9779
6113.11	542.009	51.5777	1614.98	59.5634	21.8233
32.7622	1221.93	3430.63	20.4565	9085.31	7052.87
4899.66	171.882	2647.84	3728.25	26.2616	18.7896
5269.29	150.811	16087.2	63.0428	11903.3	633.923

## Sheet: OF - Immobility
Control (0%)		Limonene (0.39%)		Myrcene (0.0083%)
A	B	A	B	A	B
82.96	1.72	0.64	1.96	0.16	61.24
3.16	0.2	0.68	0.68	57.88	0.64
0.68	199.04	29.4	2.04	4.44	12
126.56	4.36	2.04	49.76	29.04	10.76
0.52	112.52	157.48	2.8	8.28	0.4
5.08	0.08	0.4	76.36	23.4	0.84
103.36	11.04	1.44	44.48	7.24	0.68
4.04	31.56	85.6	1.6	190.04	106.72
76	19.56	29.76	85.16	7	1.28
120.4	11.56	360.16	4.64	234.36	31.56

## Sheet: OF - High Mobility
																		Control (0%)		Limonene (0.39%)		Myrcene (0.0083%)
																		A	B	A	B	A	B
																		9.96	2.84	16.32	31	17.4	25.88
																		12.48	3.64	2.4	3.6	29.12	8.68
																		6.28	9.28	34.44	11.52	6.2	2.56
																		16.68	6.68	37.2	38.4	33	7.48
																		22.64	27.32	9.92	11.52	4.88	6.8
																		17.88	2.32	5.8	5.48	2	2.92
																		41.12	42.4	6.44	13.08	7.56	3.6
																		18.36	12.84	7.68	2.04	23.76	23.4
																		35.28	10.76	61.04	19.96	9	2.56
																		19.56	5.2	0	9.16	8.24	4.2

## Sheet: NOA - Distance Moved
Control (0%)		Limonene (0.39%)		Myrcene (0.0083%)
A	B	A	B	A	B
882.732	2972.35	5190.34	5831.07	6891.55	5329.5
3617.39	5447.43	3779.25	4275.86	4318.25	4897.18
4545.54	2074.27	4297.8	6194.34	4698.89	4697.96
5868.18	2757.31	4177.49	3994.01	2515.07	4343
5648.23	5690.77	1827.25	3666.63	5648.57	5822.02
4369.18	5326.61	5084.36	2872.83	4435.7	4104.54
5624.02	3159.09	4036.51	5290.05	5510.16	5018.75
5519.58	5454.3	4030.97	2455.02	3696.43	2732.14
2981.39	4491.02	3843.1	3456.7	5933.71	4136.97
7352.12	3534.71	607.487	4743.2	1647.48	3643.87

## Sheet: NOA - Velocity
Control (0%)		Limonene (0.39%)		Myrcene (0.0083%)
A	B	A	B	A	B
1.47122	4.95392	8.65057	9.71844	11.4859	8.8825
6.02898	9.07906	6.29875	7.12643	7.19709	8.16196
7.57589	3.45712	7.163	10.3239	7.83201	7.82993
9.78031	4.59551	6.96249	6.65668	4.19178	7.23834
9.41371	9.48462	3.04542	6.11105	9.41428	9.70337
7.28196	8.87768	8.47394	4.78805	7.39284	6.8409
9.37337	5.26516	6.72752	8.81674	9.18359	8.36458
9.1993	9.09051	6.71828	4.0917	6.16072	4.55357
4.96899	7.48503	6.40516	5.76116	9.88951	6.89494
12.2535	5.89118	1.01248	7.90533	2.74579	6.07312

[truncated: 6 more sheets: NOA - Center Zone, NOA - Transition Zone, NOA - Thigmotaxis Zone, NOA - Meandering, NOA - Immobility, NOA - High Mobility]
